# Supplementary material
Source: HighWire-hosted journal article supplement (https://lupus.bmj.com/content/5/1/e000263)
Supplement: inline-supplementary-material-1 [file inline-supplementary-material-1.docx]

**SUPPLEMENTARY MATERIALS**

**erythrocyte BOUND c4D IN COMBINATION with COMPLEMENT AND AUTOANTIBODY STATUS FOR THE MONITORING OF SYSTEMIC LUPUS ERYTHEMATOSUS**

**Supplementary Table I**: Elements of the 1982 ACR criteria revised in 1997

| Criteria | Study  group 1 | Study  group 2 | Study  group 3 | Study  groups 1- 3 |
| --- | --- | --- | --- | --- |
| Malar rash | 51% | 70% | 43% | 60% |
| Discoid rash | 22% | 23% | 17% | 22% |
| Photosensitivity | 22% | 61% | 61% | 49% |
| Oral ulcers | 19% | 61% | 57% | 48% |
| Arthritis | 68% | 95% | 96% | 87% |
| Pleuritis or pericarditis | 24% | 38% | 70% | 40% |
| Renal | 65% | 25% | 30% | 38% |
| Neurological | 5% | 19% | 13% | 14% |
| Hematological | 54% | 53% | 57% | 54% |
| Immunologic | 97% | 91% | 57% | 86% |
| ANA | 97% | 100% | 100% | 99% |
| Score (average) | 5.2 | 6.4 | 6.0 | 6.0 |

**Supplementary Table II**: Elements of the clinical SELENA-SLEDAI at baseline.

| Manifestations | Study  group 1 | Study  group 2 | Study  group 3 | Study  groups 1- 3 |
| --- | --- | --- | --- | --- |
| psychosis | 0% | 0% | 0% | 0% |
| visual | 0% | 0% | 0% | 0% |
| cranial | 0% | 0% | 0% | 0% |
| headache | 0% | 0% | 0% | 0% |
| cva | 0% | 0% | 0% | 0% |
| urinary cast | 0% | 0% | 0% | 0% |
| seizure | 3% | 0% | 0% | 1% |
| brain | 3% | 0% | 0% | 1% |
| myositis | 3% | 0% | 0% | 1% |
| pericarditis | 3% | 0% | 0% | 1% |
| vasculitis | 5% | 3% | 0% | 3% |
| pleurisy | 0% | 6% | 0% | 3% |
| thrombocytopenia | 8% | 0% | 4% | 3% |
| leukopenia | 5% | 6% | 0% | 5% |
| fever | 8% | 6% | 0% | 6% |
| pyuria | 19% | 5% | 0% | 8% |
| hematuria | 24% | 5% | 0% | 10% |
| mucosal | 22% | 23% | 9% | 20% |
| proteinuria | 49% | 11% | 0% | 20% |
| rash | 38% | 28% | 0% | 26% |
| alopecia | 35% | 30% | 39% | 33% |
| arthritis | 32% | 83% | 9% | 54% |
